# Supplementary material
Source: PubMed Central journal article supplement (PMC3947299)

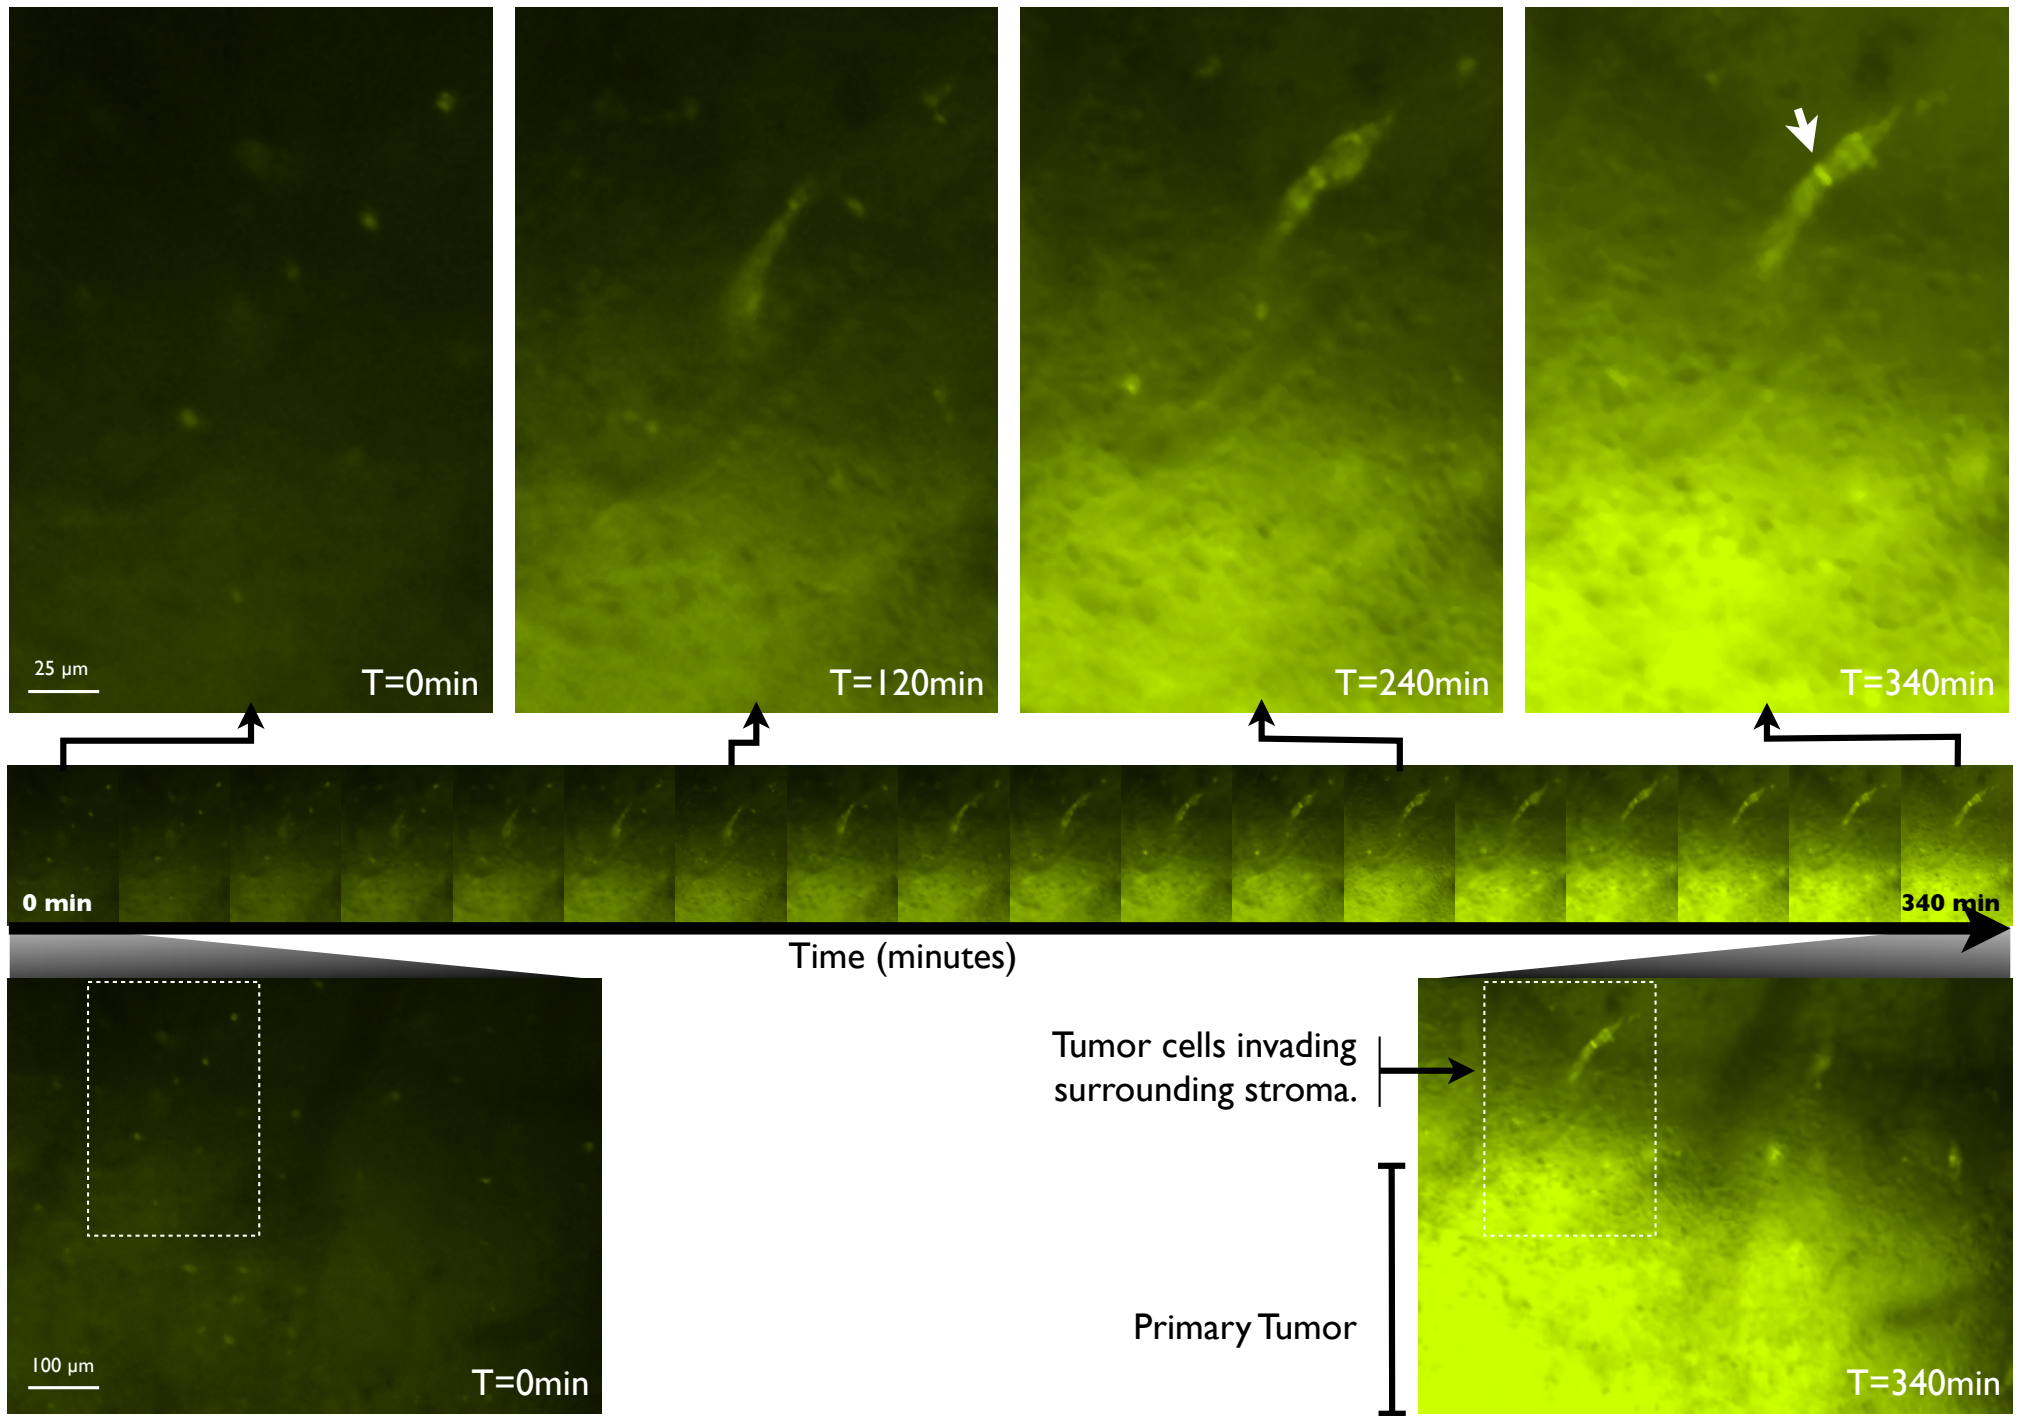

**Supplementary Figure 1**

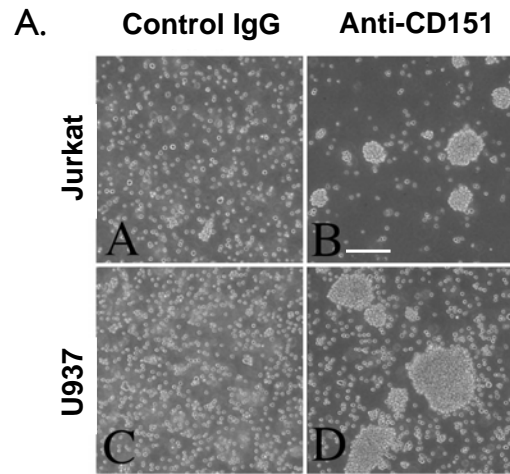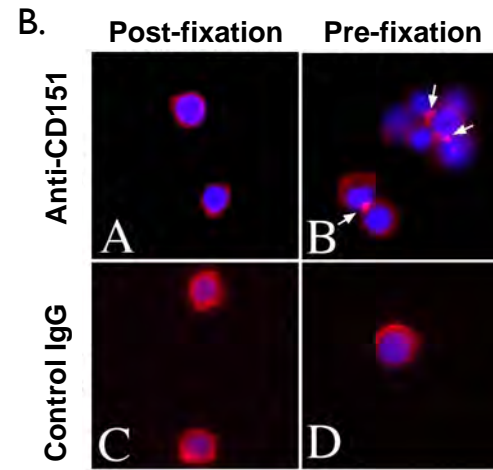

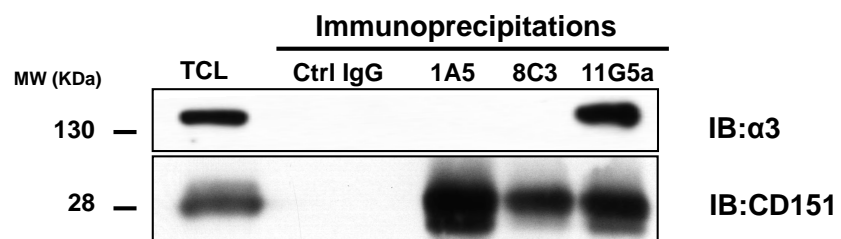

A.

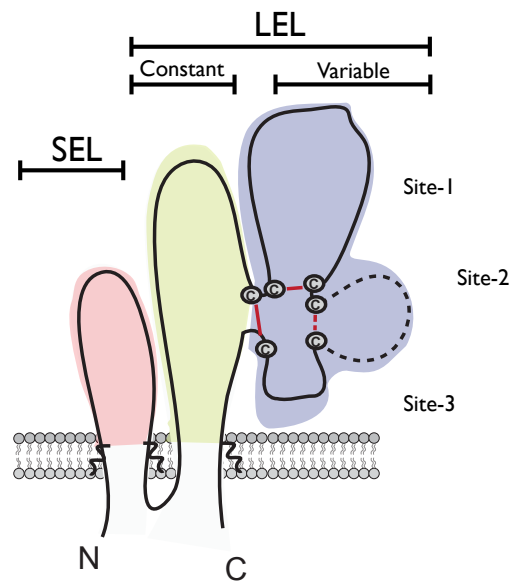

B.

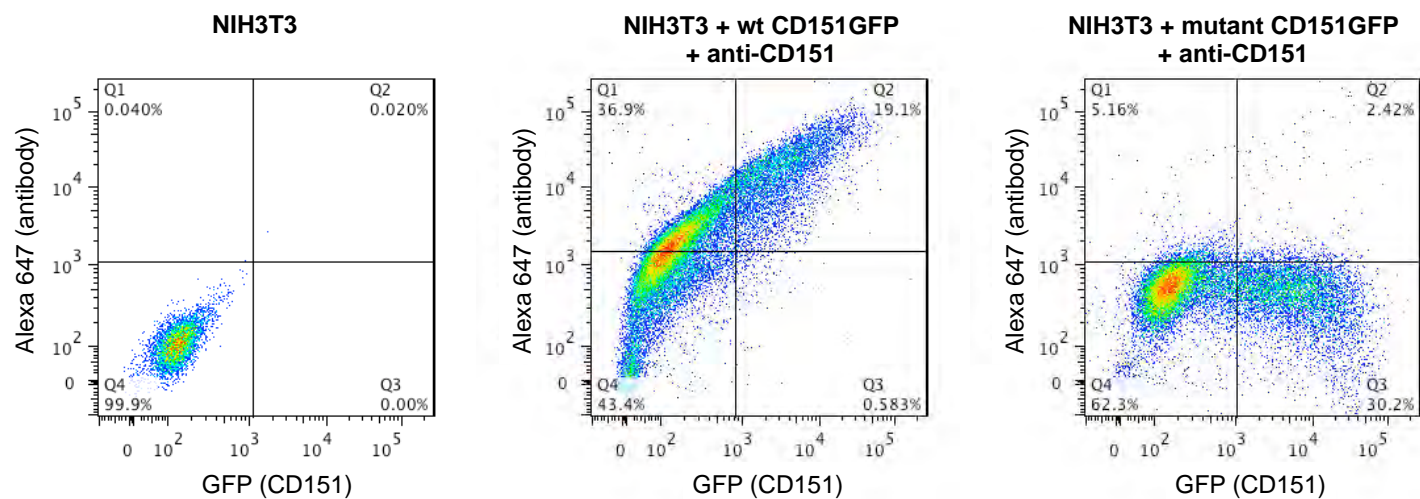

C.

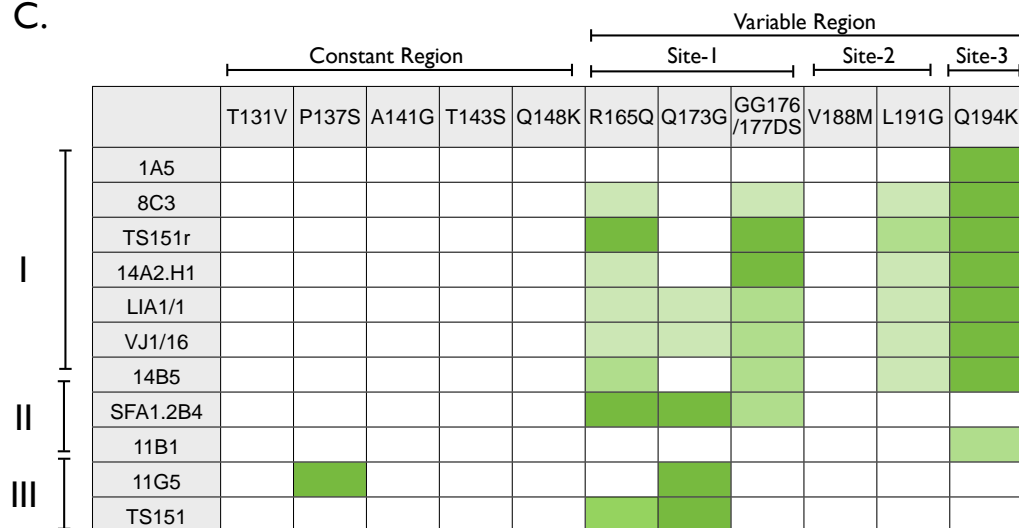

D.

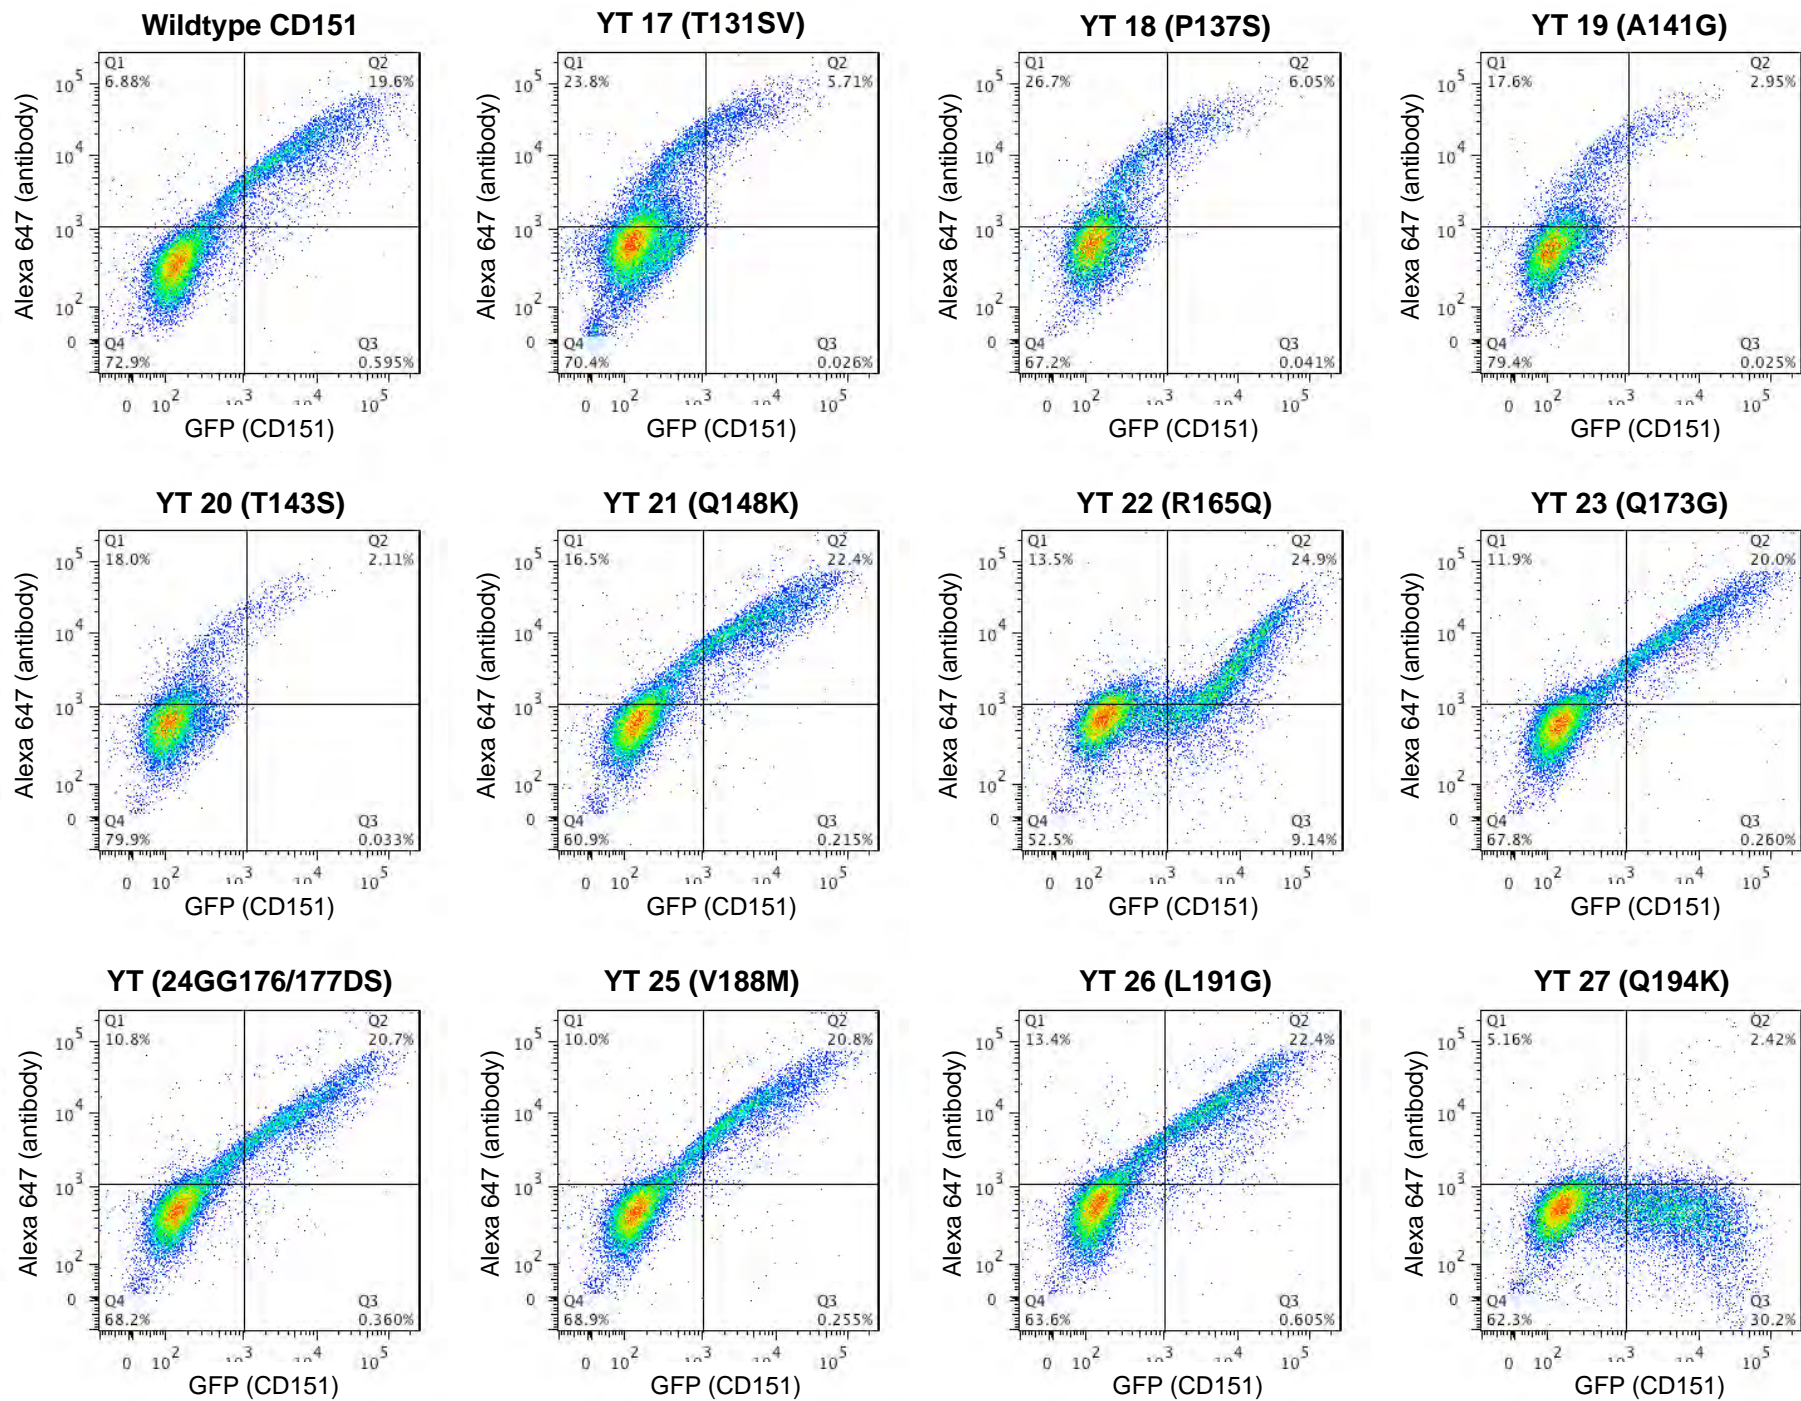

Supplementary Figure 4D

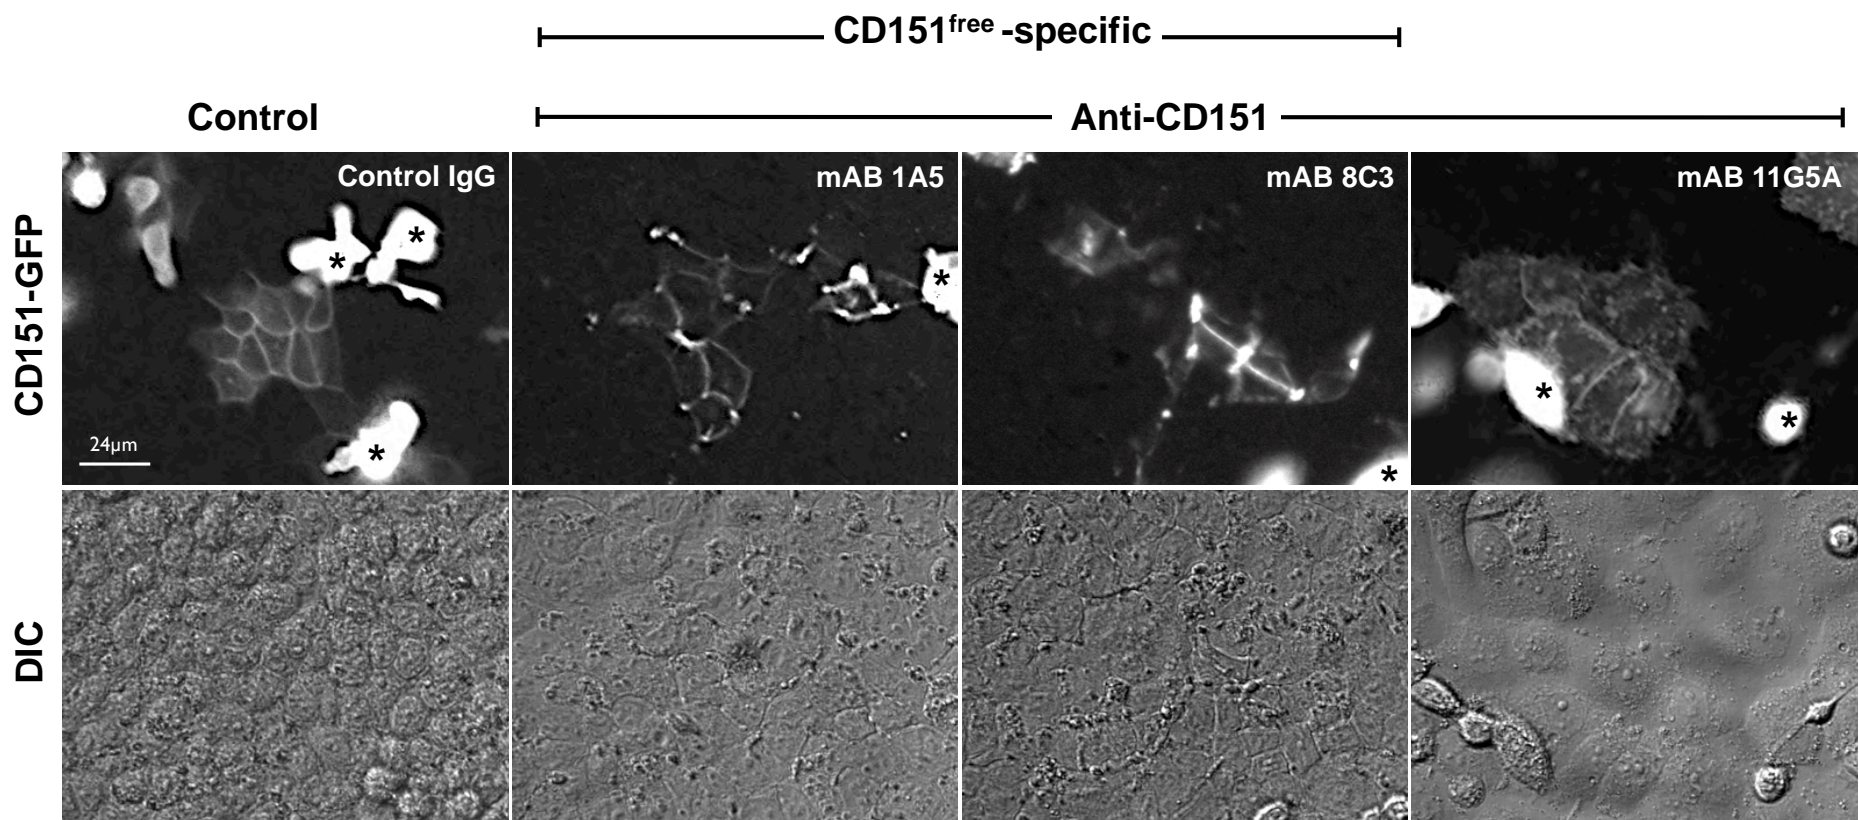

Supplementary Figure 5

### CD151 Expression in Normal Tissues

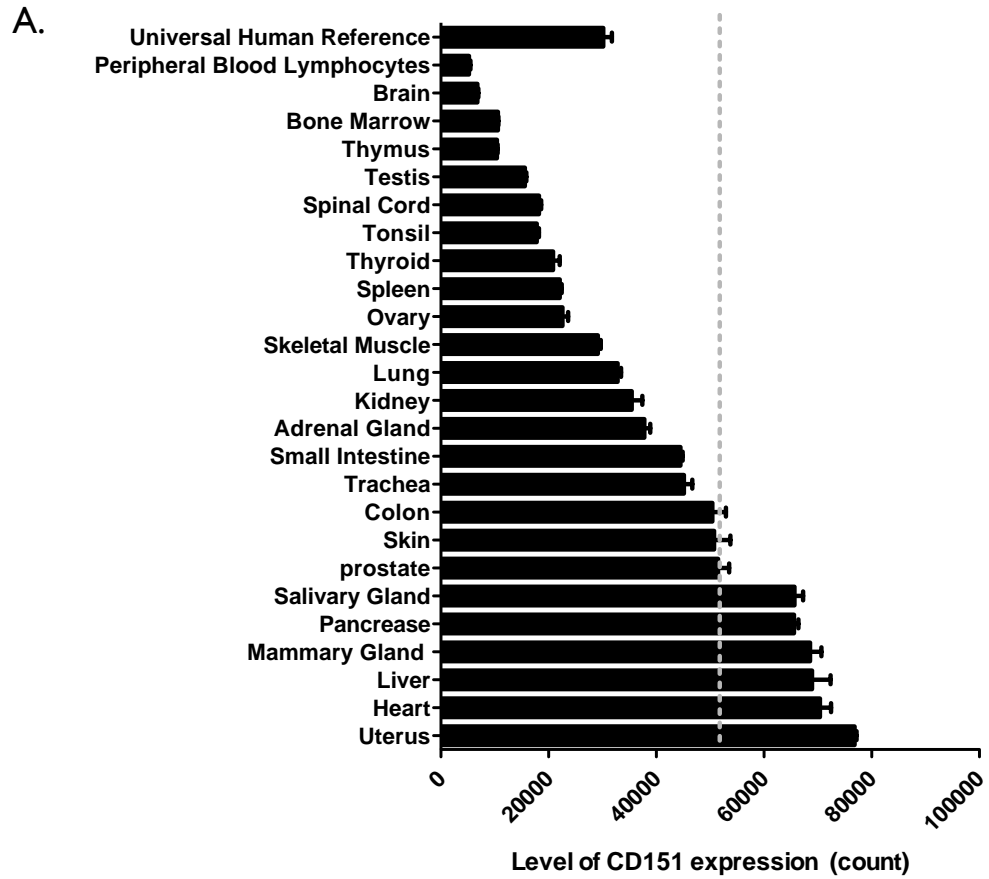

### CD151 Expression in Prostate Cancer

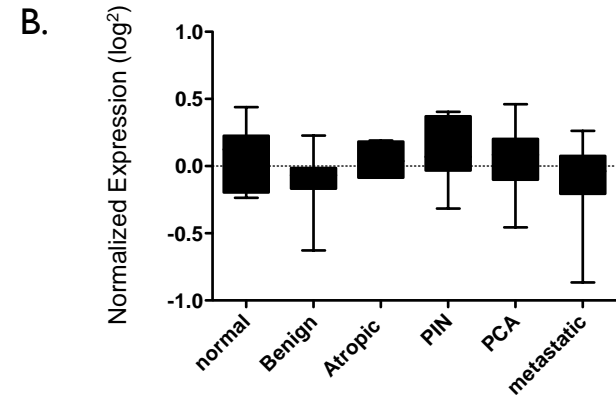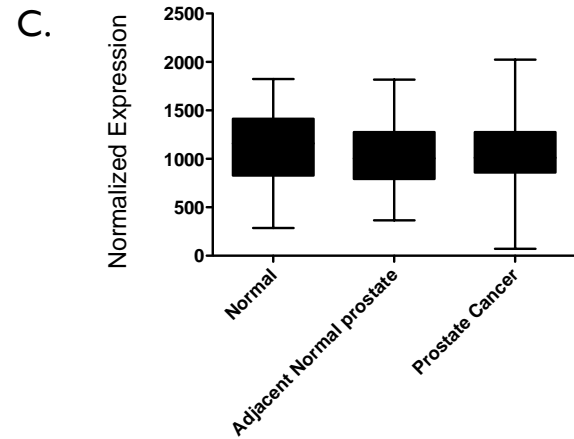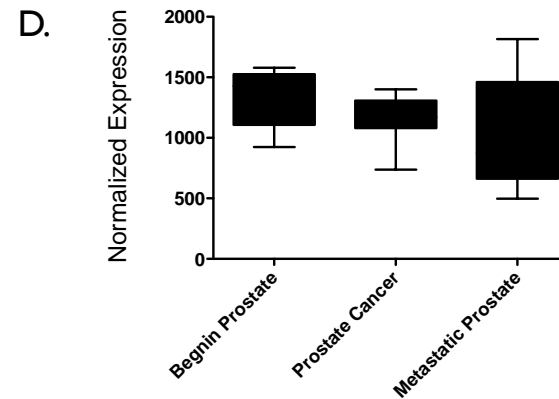

**Supplementary Figure 6**

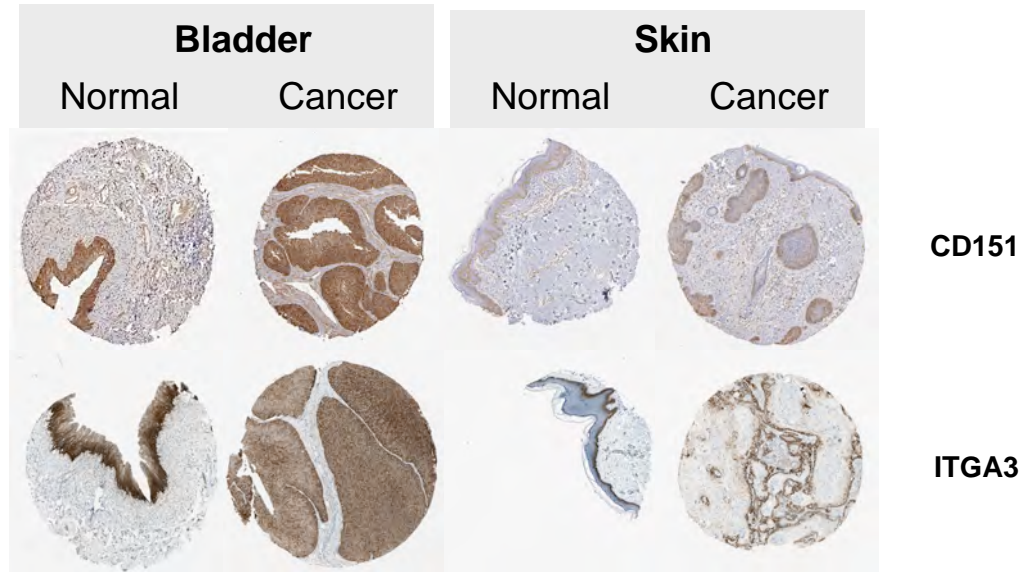

**Supplementary Figure 7**



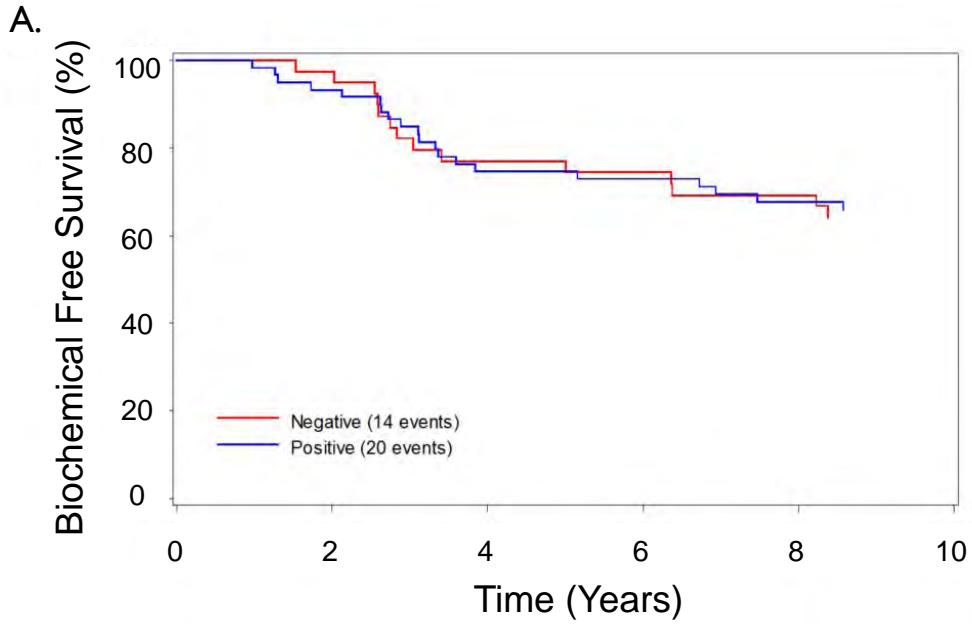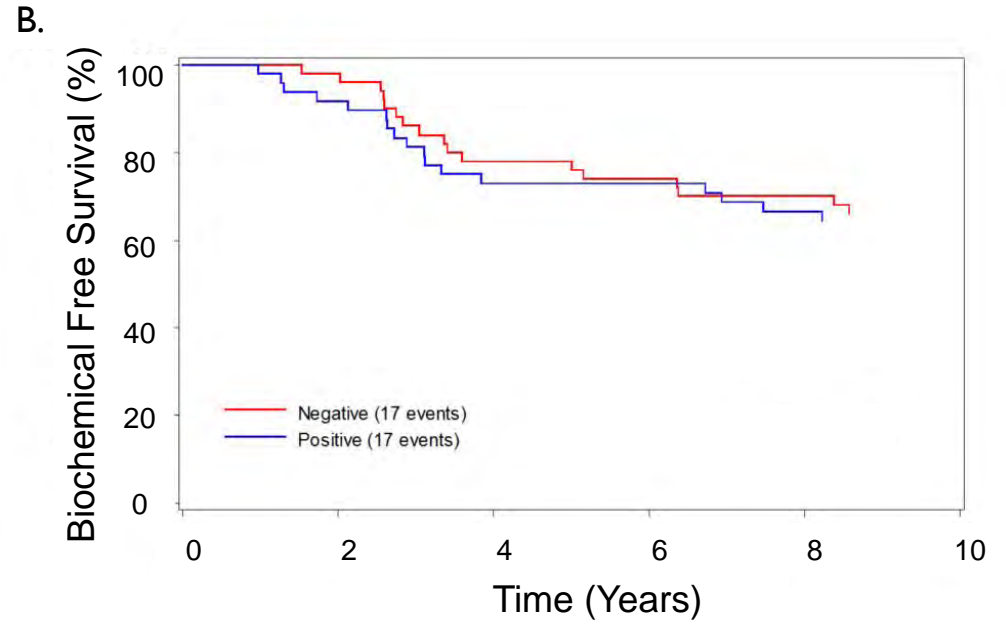

Supplement: NIHMS539942-supplement-2.pdf [file NIHMS539942-supplement-2.pdf]
