# Supplementary material
Source: PubMed Central journal article supplement (PMC3947299)
Supplement: NIHMS539942-supplement-1.pdf [file NIHMS539942-supplement-1.pdf]

## SUPPLEMENTAL MATERIALS

### SUPPLEMENTAL TABLES

**Supplemental Table 1.** Demographic information of patients that underwent RRP at the London Regional Cancer Program between 1994 and 1998 (*n*=99)

| <b>Variable</b>       | <b>Value (SD)</b>              |
|-----------------------|--------------------------------|
| Age (years)           | 62.4 (5.7)                     |
| PSA (ng/mL)           | 9.7 (5.2)                      |
| Follow up (years)     | 12.1 (1.6)                     |
| <b>Clinical Stage</b> | <b># patients (% of total)</b> |
| T1                    | 36 (36.4%)                     |
| T2                    | 55 (55.5%)                     |
| T3                    | 2 (2.0%)                       |
| Unknown               | 6 (6.1%)                       |

**Supplemental Table 2.** Pathological and clinical outcomes of patients that underwent RRP at the London Regional Cancer Program between 1994 and 1998 (*n*=99)

| <b>Variable</b>           | <b># patients (% of total)</b> |
|---------------------------|--------------------------------|
| <b>Pathological stage</b> |                                |
| pT2                       | 60 (60.6%)                     |
| pT3                       | 35 (35.4%)                     |
| pT4                       | 4 (4%)                         |
| <b>Gleason</b>            |                                |
| ≤6                        | 26 (26.2%)                     |
| 7                         | 38 (38.3%)                     |
| ≥8                        | 27 (27.3%)                     |
| Unknown                   | 8 (8.0%)                       |
| <b>Margins</b>            |                                |
| Negative                  | 76 (77.6%)                     |
| Positive                  | 23 (23.2%)                     |
| <b>Seminal vesicles</b>   |                                |
| Negative                  | 87 (87.9%)                     |
| Positive                  | 12 (12.1%)                     |
| Positive Nodes            | 0                              |
| Biochemical failure       | 35 (35.4%)                     |
| Hormone resistance        | 1 (1%)                         |
| Bone metastasis           | 2 (2.1%)                       |
| Solid organ metastasis    | 2 (2.1%)                       |

**Supplemental Table 3.** Demographic information of patients that developed metastasis during follow up at the London Regional Cancer Program between 1994 and 1998 (*n*=38)

| <b>Variable</b>       | <b>% (SD)</b>                  |
|-----------------------|--------------------------------|
| Age (years)           | 66.7 (9.76)                    |
| <b>Clinical Stage</b> | <b># patients (% of total)</b> |
| T1                    | 6 (15.7%)                      |
| T2                    | 19 (50%)                       |
| T3                    | 10 (26.3%)                     |
| T4                    | 1 (2.6%)                       |
| Unknown               | 2 (5.2%)                       |
| <b>Gleason</b>        |                                |
| ≤7                    | 19 (50%)                       |
| ≥8                    | 19 (50%)                       |
| Hormone resistance    | 31 (81.5%)                     |
| Bone metastasis       | 34 (89.4%)                     |
